# Supplementary material
Source: ML conference proceedings conference paper supplement (https://proceedings.neurips.cc/paper_files/paper/2020/hash/0e1bacf07b14673fcdb553da51b999a5-Abstract.html)
Supplement: Supplementary file [file 0e1bacf07b14673fcdb553da51b999a5-Supplemental.pdf]

---

# Contextual Reserve Price Optimization in Auctions via Mixed-Integer Programming

---

**Joey Huchette**  
Rice University  
joehuchette@rice.edu

**Haihao Lu**  
University of Chicago  
haihao.lu@chicagobooth.edu

**Hossein Esfandiari**  
Google Research  
esfandiari@google.com

**Vahab Mirrokni**  
Google Research  
mirrokni@google.com

## Abstract

We study the problem of learning a linear model to set the reserve price in an auction, given contextual information, in order to maximize expected revenue from the seller side. First, we show that it is not possible to solve this problem in polynomial time unless the *Exponential Time Hypothesis* fails. Second, we present a strong mixed-integer programming (MIP) formulation for this problem, which is capable of exactly modeling the nonconvex and discontinuous expected reward function. Moreover, we show that this MIP formulation is ideal (i.e. the strongest possible formulation) for the revenue function of a single impression. Since it can be computationally expensive to exactly solve the MIP formulation in practice, we also study the performance of its linear programming (LP) relaxation. Though it may work well in practice, we show that, unfortunately, in the worst case the optimal objective of the LP relaxation can be  $\mathcal{O}(\text{number of samples})$  times larger than the optimal objective of the true problem. Finally, we present computational results, showcasing that the MIP formulation, along with its LP relaxation, are able to achieve superior in- and out-of-sample performance, as compared to state-of-the-art algorithms on both real and synthetic datasets. More broadly, we believe this work offers an indication of the strength of optimization methodologies like MIP to exactly model intrinsic discontinuities in machine learning problems.

## 1 Introduction

Digital advertising is a tremendously fast growing industry: the worldwide digital advertising expenditure was \$283 billion in 2018, and it is estimated to further grow to \$517 billion in 2023.<sup>1</sup>

Real time bidding (RTB) stands out as one of the most significant developments of the past decade in the space of advertisement allocation mechanisms, as it is widely utilized by major online advertising platforms including—but not limited to—Google, Facebook, and Amazon. In RTB for display ads, a user visiting a webpage instantaneously triggers an auction held by an Ad Exchange, wherein the winner of the auction earns the ad slot and pays the publisher a certain price.

A form of auction commonly used in practice by Ad Exchanges is a second-price auction with reserve price [22]. In such auctions, the publisher or Ad Exchange sets a reserve price before the auction is held, and the highest bidder wins the ad slot and pays the maximum of the second price and the

---

<sup>1</sup>“Digital advertising spending worldwide 2018-2023”, retrieved May 25 2020 from <https://www.statista.com/statistics/237974/online-advertising-spending-worldwide/>

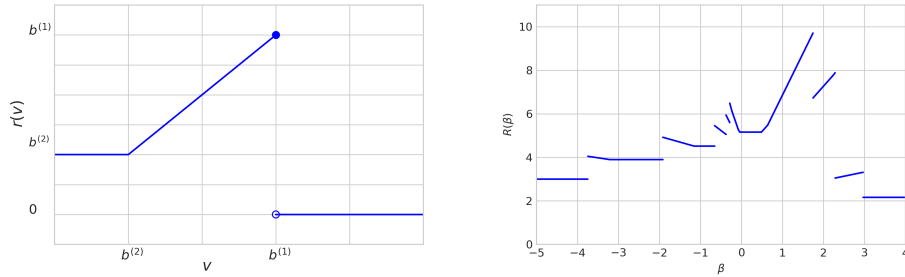

Figure 1: **(Left)** The revenue function  $r(v; b^{(1)}, b^{(2)})$ . **(Right)** Average revenue function  $R(\beta)$  with  $d = 1$  features and  $n = 8$  samples.

reserve price. Reserve prices can increase revenue if they are set between the top two bids, but can also lead to a failed auction if set too high.

One central question for Ad Exchanges is *how to set the reserve price for each incoming impression in order to maximize the total revenue*. In general, the reserve price is set based on the contextual information of the ad campaign, including publisher data (e.g. ad site and ad size), user data (e.g. device type and various geographic information), and time (e.g. date and hour). In this paper, we aim to learn an offline linear model to set the reserve price in order to maximize total revenue on the seller side, using available contextual information. We model this via the optimization problem

$$\max_{\beta \in X} R(\beta) := \frac{1}{n} \sum_{i=1}^n r(\mathbf{w}^i \cdot \beta; b_i^{(1)}, b_i^{(2)}), \quad (1)$$

where  $b_i^{(1)}$  and  $b_i^{(2)}$  are, respectively, the (nonnegative) highest bidding price and the second highest bidding price of impression  $i$ ,  $\mathbf{w}^i \in \mathbb{R}^d$  is the contextual feature vector of impression  $i$ , and  $X = [L, U]^d \subset \mathbb{R}^d$  is a bounded hypercube which serves as a feasible region for the model parameters  $\beta$ . Note that, by artificially modifying the problem data, (1) can readily recover a first price auction (by setting  $b^{(2)} = b^{(1)}$ ) or a pure price-setting problem (by setting  $b^{(2)} = 0$ ). Additionally,  $r$  is the discontinuous reward function

$$r(v; b^{(1)}, b^{(2)}) := \begin{cases} b^{(2)} & v \leq b^{(2)} \\ v & b^{(2)} < v \leq b^{(1)} \\ 0 & v > b^{(1)} \end{cases}. \quad (2)$$

Figure 1 plots the reward function  $r(v; b^{(1)}, b^{(2)})$ , which is a simple univariate (though discontinuous) function for given bidding prices  $b^{(1)}$  and  $b^{(2)}$ . If the reserve price is set below  $b^{(2)}$ , the auction reverts to a second price auction. If the seller manages to set the reserve price in the “sweet spot” between  $b^{(2)}$  and  $b^{(1)}$ , the seller can capture additional revenue from the auction. However, the seller must be wary not to set the reserve price too high, as in this case the sale does not occur and the reward drops to zero. Note that the reserve price is set after the contextual information is observed, but before the bidding prices are observed, making this price setting problem nontrivial.

Although the univariate function  $r(\cdot; b^{(1)}, b^{(2)})$  is simple, the average revenue function  $R$  can be extremely complicated, even for small problem instances. Figure 1 plots the average revenue  $R(\beta)$  over 8 samples as a function of a single feature  $\beta \in \mathbb{R}$ , randomly drawn from a log-normal distribution as specified in Section 4. As we can see in Figure 1, the average revenue function  $R$  has many local maximizers and is discontinuous, even in the small-sample, univariate setting. This complexity will only be exacerbated in the large-sample, multivariate case which is the focus of this paper.

As the reserve price must be set before the auction is held, any proposed model must allow extremely fast inference. However, the model can be trained off-line and then updated at regular intervals (e.g. daily or weekly), meaning that learning need not happen in real time. We focus on linear models in this submission, as their simplicity, interpretability, and fast inference lend themselves exceedingly well to the RTB setting. However, the proposed formulation and techniques can also be extended to more complicated machine learning models, such as kernel methods and (optimal) decision trees.

Moreover, many RTB platforms support an incredibly large number of auctions, meaning that an enormous amount of training data is available. This motivates learning algorithms which are highly scalable and, ideally, parallelizable.

## 1.1 Our Results

Our contribution in this work is threefold.

**Hardness (Section 2).** Our first main result is to build off the intuition gleaned from Figure 1 to show that (1) is, indeed, a hard problem. In particular, we show that there is no algorithm that solves (1) in polynomial time unless the Exponential Time Hypothesis fails. The Exponential Time Hypothesis is a very popular assumption in computational complexity concerning the 3-SAT problem [31], and it is the basis of many hardness results [1, 10, 11, 13, 18, 29, 34, 36, 42]. The Exponential Time Hypothesis states that 3-SAT can not be solved in subexponential time in the worst case. In order to show this result, we reduce our problem to the classic  $k$ -densest subgraph problem.

**New algorithms (Section 3).** Our second main result is an exact model for the problem using Mixed-Integer Programming (MIP). MIP is an optimization methodology capable of modeling complex, nonconvex feasible regions, and which is widely used in practice. In particular, MIP allows us to *exactly* model the underlying discontinuous reward function, without relying on convex or continuous proxies which may be poor approximations or require careful hyperparameter tuning.

One issue with MIP is that it is not scalable beyond medium-sized instances, and so it cannot be brought to bear on problem instances with millions of past observations. In order to deal with the large-scale problems in daily auctions, we propose a Linear Programming (LP) relaxation of our MIP formulation. Modern LP solvers, such as Gurobi, are capable of solving very large LPs with millions of variables. The solution to the LP not only provides a valid upper bound to the optimal expected revenue, but can also yield feasible solutions to (1). While these solutions are often of relatively good quality, we show that in the worst case the LP relaxation can produce arbitrarily bad bounds on the true optimal reward.

**Computational validation (Section 4).** Finally, we present a thorough computational study on both synthetic and real data. We start with a low-dimensional artificial data set where we observe that existing methods, while exhibiting low generalization error, are substantially outperformed by our approaches. We also study a real data set comprised of eBay sports memorabilia auctions, where we observe a consistent improvement of our MIP-based methods over existing techniques. In both studies, we observe that our MIP formulation substantially outperforms the LP relaxation, its convex counterpart, suggesting the merit of using principled nonconvex approaches for this problem.

## 1.2 Related Work

**Reserve price optimization.** Reserve price optimization has been widely studied in both academia and industry due to its critical role in online advertisement. The main departure of our setting from much of the literature in this area is our explicit incorporation of the contextual information  $w$  into the optimization. Most previous theoretical works proceed under the assumption that the bidding prices come from a certain distribution without the consideration of contextual information. For example, [12] shows a regret minimization under the assumption that all bids are independently drawn from the same unknown distribution; [30] shows the constant reserve is optimal when the distribution is known and satisfies certain regularity assumptions; and [2] studies the case when the buyers are strategic and would like to maximize their long-term surplus.

In practice, however, an Ad Exchange logs contextual information of every auction and uses this data to determine future reserve price. For example, in a large field study at Yahoo! [39], contextual information was used to learn the bidding distribution of buyers, which was then used to set up the future reserve price. This is an indirect use of contextual information. In contrast, (1) builds a linear model for reserve price optimization by directly using the contextual information.

To the best of our knowledge, the only work which directly uses the contextual information to set up the reserve price is that of Mohri and Medina [38]. In order to handle the discontinuity in the revenue function  $r$ , [38] present a continuous piecewise linear surrogate function, and optimize over this surrogate function using difference-of-convex programming. There are several difficulties of the method proposed in [38]: (i) it is non-trivial to tune the hyper-parameter  $\gamma$  in the surrogate function,

which controls the closeness of the two problems and the hardness to solve the surrogate problem; (ii) the global convergence of difference-of-convex programming is slow (requiring, e.g., a cutting plane or branch-and-bound method) and requires a careful implementation [26], and (iii) it can only find a local optimizer of the surrogate problem. In contrast, we directly solve the reserve price optimization problem (1) by mixed-integer programming.

**Mixed-integer programming for piecewise linear functions.** Mixed-integer programming has long been used to model piecewise linear functions in a number of application areas as disparate as operations [16, 17, 33], analytics [7, 8], engineering [23, 24], and robotics [19, 20, 32, 37]. In this literature, our approach is most related to a recent strain of approaches applying MIP to model high-dimensional piecewise linear functions arising as trained neural networks for various tasks such as verification and reinforcement learning [4, 3, 40, 41]. Moreover, there are sophisticated and mature implementations of algorithms for mixed-integer programming (i.e. *solvers*) that can reliably solve many instances of practical interest in reasonable time frames.

**Hardness.** We study the hardness of the reserve price optimization problem (1) and show that it is impossible to solve in polynomial time unless the *Exponential Time Hypothesis* [27] fails. The exponential time hypothesis is a very popular assumption in computational complexity and it is the basis for many hardness results such as approximating the best Nash equilibrium [11],  $k$ -densest subgraph [10, 27], SVP [1], network design [14], and many others [34, 42, 29, 13, 18, 36].

## 2 Hardness

In this section we show the hardness of the reserve price optimization problem (1). Specifically, we show that it is not possible to solve this problem in polynomial time unless the Exponential Time Hypothesis fails. We prove this by showing that a polynomial time optimal algorithm for this problem implies a polynomial time constant approximation algorithm for the  $k$ -densest subgraph problem.

**Definition 1** ( $k$ -densest subgraph problem). *Take a graph  $G = (V_G, E_G)$ , where  $V_G$  represents the vertex set and  $E_G$  represents the edge set. The goal is to find a subgraph  $H = (V_H, E_H) \subseteq G$  with  $|V_E| = K$  that maximizes  $\frac{|E_H|}{|V_H|}$ .*

There is no  $|V_G|^{-1/\text{poly}(\log \log |V_G|)}$ -approximation polynomial time algorithm for the  $k$ -densest subgraph problem unless the exponential time hypothesis fails [36]. Therefore, we produce a reduction that gives the following result.

**Theorem 1.** *There is no polynomial time algorithm for the reserve price optimization problem (1), unless the Exponential Time Hypothesis fails.*

The proofs for Theorem 1, and all other technical results, are deferred to the Appendix.

## 3 New formulations

In this section, we develop a mixed-integer programming (MIP) formulation for solving (1), study its important computational properties, and discuss how to use it in practice.

MIP is a common optimization methodology capable of modeling complex, nonconvex constraints. MIP formulations comprise a set of linear constraints in the decision variables, along with integrality constraints on some (or all) of the variables.

In order to model (1) with MIP, we first start with the graph of the revenue function  $r(\cdot; b^{(1)}, b^{(2)})$ , which is defined as  $\text{gr}(r(\cdot; b^{(1)}, b^{(2)}); D) := \{ (v, y) \mid v \in D, y = r(v; b^{(1)}, b^{(2)}) \}$ . This set is not closed, due to the discontinuity of  $r$  at input  $b^{(1)}$ . Nonetheless, (1) can be reformulated using closures:

$$\max_{\beta, \mathbf{v}, \mathbf{y}} \frac{1}{n} \sum_{i=1}^n y_i \tag{3a}$$

$$\text{s.t. } v_i = \mathbf{w}^i \cdot \beta \quad \forall i \in \llbracket n \rrbracket \tag{3b}$$

$$(v_i, y_i) \in \text{cl}(\text{gr}(r(\cdot; b_i^{(1)}, b_i^{(2)}); [l_i, u_i])) \quad \forall i \in \llbracket n \rrbracket \tag{3c}$$

$$\beta \in X, \tag{3d}$$

where the bounds on the  $v$  variables are computed as  $l_i := \min_{\beta \in X} \mathbf{w}^i \cdot \beta$  and  $u_i := \max_{\beta \in X} \mathbf{w}^i \cdot \beta$ . It is straightforward to add a learned constant offset term  $\beta_0$  to the model by changing (3b) to  $v_i = \mathbf{w}^i \cdot \beta + \beta_0$ , though we omit it for the remainder of the section for notational simplicity.

**Proposition 1.** *If a point  $(\beta, \mathbf{v}, \mathbf{y})$  is an optimal solution for (3), then  $\beta$  is an optimal solution for (1). Conversely, if  $\beta$  is an optimal solution for (1), then there exists some  $\mathbf{v}$  and  $\mathbf{y}$  such that  $(\beta, \mathbf{v}, \mathbf{y})$  is an optimal solution for (3).*

We can now construct a mixed-integer programming formulation for (3c).

**Proposition 2.** *A valid MIP formulation for the constraint*

$$(v, y) \in \text{cl}(\text{gr}(r(\cdot; b^{(1)}, b^{(2)}); [l, u])) \quad (4)$$

is:

$$y \leq b^{(2)}z_1 + b^{(1)}z_2, \quad y \geq b^{(2)}(z_1 + z_2) \quad (5a)$$

$$y \leq v + (b^{(2)} - l)z_1 - b^{(1)}z_3, \quad y \geq v - uz_3 \quad (5b)$$

$$l \leq v \leq u \quad (5c)$$

$$z_1 + z_2 + z_3 = 1, \quad \mathbf{z} \in [0, 1]^3 \quad (5d)$$

$$\mathbf{z} \in \mathbb{Z}^3. \quad (5e)$$

Piecing it all together, we can present a MIP formulation for the original problem (1).

**Corollary 1.** *Take  $F(b^{(1)}, b^{(2)}, l, u)$  as the set of all points feasible for (5), given data  $b^{(1)}, b^{(2)}, l$ , and  $u$ . Modify (3) by, for each  $i \in \llbracket n \rrbracket$ , replacing the constraint (3c) with the constraint  $(v_i, y_i) \in F(b_i^{(1)}, b_i^{(2)}, l_i, u_i)$ ; call this modification MIP. Then (1) is equivalent to MIP in the sense that: (i) if  $(\beta, \mathbf{v}, \mathbf{y})$  is an optimal solution to MIP, then  $\beta$  is an optimal solution to (1), and (ii) if  $\beta$  is an optimal solution to (1), then there exists some  $\mathbf{v}$  and  $\mathbf{y}$  such that  $(\beta, \mathbf{v}, \mathbf{y})$  is an optimal solution to MIP.*

### 3.1 The tightness of formulation (5)

One measure of the quality of a MIP formulation is how tightly its LP relaxation approximates the set it formulates. MIP formulations with tight relaxations are likely to solve much more quickly than those with looser relaxations. The tightest possible MIP formulation is *ideal*, wherein all extreme points of the LP relaxation are integral [43]. The next proposition shows that (5) is ideal for (4).

**Proposition 3.** *The MIP formulation (5) is ideal for (4), in the sense that the linear programming relaxation (5a-5d) is a description of the convex hull of all  $(v, y, \mathbf{z})$  feasible for (5).*

### 3.2 The feasible region

While the statement of the problem (1) constrains the model parameters  $\beta$  to lie within a bounded hypercube, it may be difficult to infer the correct size of the domain a priori. To illustrate, we present a low-dimensional family of instances where the problem data is bounded in magnitude, but nevertheless the magnitude of the optimal model parameters goes to infinity.

**Proposition 4.** *Fix  $n = 2$  samples and  $d = 2$  features, and consider  $X = \mathbb{R}^2$ , i.e. the unbounded variant of (1). There exists a sequence of instances where the problem data is bounded in magnitude by one, and yet the magnitude of the unique optimal solution to (1) grows arbitrarily large.*

In other words, we cannot bound the magnitude of the components of an optimal solution solely as a function of  $n, d$ , and the magnitude of the data. However, due to existential representability results [28], applying MIP formulation techniques to model (1) will require a bounded domain  $X$  on the model parameters. To circumvent this, we model the magnitude of the bounding box as a hyperparameter, and tune it using a validation data set. This is the same approach taken in the difference-of-convex algorithm due to Mohri and Medina [38].

### 3.3 The linear programming relaxation

Our MIP formulation (5) comprises two types of constraints: linear constraints (5a-5d), and integrality constraints (5e). The linear programming relaxation comprises only the linear constraints, and

provides a valid dual upper bound on the optimal reward of a linear programming formulation. Furthermore, for this particular problem, each feasible solution for the linear programming relaxation corresponds to a feasible solution for the original problem (1).

**Proposition 5.** *Take  $W(b^{(1)}, b^{(2)}, l, u)$  as the set of all points feasible for the LP relaxation (5a-5d) of (4), given data  $b^{(1)}$ ,  $b^{(2)}$ ,  $l$ , and  $u$ . Modify (3) by, for each  $i \in \llbracket n \rrbracket$ , replacing the constraint (3c) with the constraint  $(v_i, y_i) \in W(b_i^{(1)}, b_i^{(2)}, l_i, u_i)$ ; call this modification LP. Then LP is an LP relaxation of (1) in the sense that the optimal reward for LP upper bounds the reward of any feasible solution for (1). Moreover, for any feasible solution  $(\beta, \mathbf{v}, \mathbf{y})$  to LP,  $\beta$  is a feasible solution to (1).*

Therefore, a third approach to solve (1) is simply to solve the linear programming relaxation. Linear programming problems can be solved in polynomial time, and there exist algorithms that can very efficiently solve large scale problem instances. Therefore, the approach of Proposition 5 can be applied to very large scale instances of the problem (1).

In practice, the Ad Exchange usually processes millions of impressions per minute, and updates the model parameters frequently (say, every 10 minutes) by learning from the data in the past time period. In this large-scale setting, MIP-based algorithms or the approach of Mohri and Medina [38] are not viable. Fortunately, the LP relaxation method remains viable, as modern Linear Programming solvers, such as Gurobi or CPLEX, can often solve huge LP with millions of variables within minutes.

A corollary of Proposition 3 is that, if  $n = 1$ , the LP relaxation LP is exact, and so exactly represents the convex hull of feasible points for MIP. Unfortunately, the composition of ideal formulations will, in general, fail to be ideal. In fact, the the optimal reward from LP can be arbitrarily bad as  $n$  grows.

**Proposition 6.** *There is a family of instances of (1), parameterized by the sample size  $n$ , where the optimal reward of (1) decreases as  $1/n$ , but the optimal reward for the LP relaxation LP is at least 1.*

## 4 Computational study

We now perform a computational study on our proposed methods, using both synthetic and real data.

### 4.1 Implementation details

**Methods.** Throughout, we compare seven methods:

1. CP:  $\max_v \frac{1}{n} \sum_{i=1}^n r(v; b_i^{(1)}, b_i^{(2)})$  – The optimal constant reserve price policy (i.e, set the reserve price to a constant for all samples without using contextual information). It is used as a benchmark to measure the improvement to be gained from using contextual information.
2. LP: The linear programming relaxation presented in Proposition 5.
3. MIP: The MIP formulation of Corollary 1 terminated after a time limit (to be specified subsequently).
4. MIP-R: The MIP formulation of Corollary 1 terminated at the root node<sup>2</sup>.
5. DC: The difference-of-convex algorithm of Mohri and Medina [38].
6. GA: Gradient ascent, with a strong Wolfe line search.
7. UB:  $\frac{1}{n} \sum_{i=1}^n b_i^{(1)}$  – This is a perfect information upper bound equal to the average first bid price. This is the largest reward that can possibly be garnered from the auction. Note that this may be quite a loose upper bound, as in general there will not exist a linear model capable of setting such reserve prices given the contextual information.

**Hyperparameter tuning.** The LP, MIP-R, and MIP algorithms require that the parameter domain  $X$  is explicitly specified. We utilize cross validation to tune the bounds on each parameter as  $[-T, +T]$  for  $T \in \{2^{-1}, \dots, 2^9\}$ . Additionally, DC requires two hyperparameters: one for a penalty associated with the bound constraints, and the second for the “slope” of its continuous approximation of the discontinuous reward function  $r$ . We do cross-validation as suggested in Mohri and Medina [38].

<sup>2</sup>This means the solver will terminate just before beginning its enumerative tree search procedure. It will solve the LP relaxation, but crucially will also run a bevy of heuristics to improve primal solutions and dual bounds that require the knowledge that the underlying model is a MIP.

**Evaluation.** For each experiment, we report the *average reward* (i.e.  $R(\beta)$ ) of the final model from each algorithm on both the training and test data sets. We also use the “gap closed” metric to measure the improvement of MIP over DC, the best existing algorithm from the literature. This is computed as  $\frac{\text{MIP-DC}}{\text{UB-DC}}$ , where in an abuse of notation we use the algorithm names to denote their respective rewards.

**Implementation.** We implement our experiment in Julia [9]. We use JuMP [21, 35] and Gurobi v8.1.1 [25] to model and solve, respectively, the optimization problems underlying the MIP, MIP-R, LP, and DC methods. Our implementation is publicly available at: <https://github.com/joehuchette/reserve-price-optimization>.

## 4.2 Synthetic data

**Data generation.** Here we describe how we generate our synthetic data  $(\mathbf{w}^i, b_i^{(1)}, b_i^{(2)})_{i=1}^n$ . First, the feature vectors  $\mathbf{w}^i$  are generated i.i.d. from a Gaussian distribution with identity covariance matrix, i.e.,  $\mathbf{w}^i \stackrel{iid}{\sim} d^{-1/2}\mathcal{N}(0, I^d)$ , normalized so that  $\mathbb{E}\|\mathbf{w}^i\|_2^2 = 1$ . In order to generate the bidding prices  $b_i^{(1)}$  and  $b_i^{(2)}$ , we assume there are two buyers, and they have underlying generative parameters  $\mathbf{c}_1$  and  $\mathbf{c}_2$ , such that their bids come from log-normal distributions as  $b_1^i \stackrel{iid}{\sim} \mathcal{LN}(\mathbf{c}_1 \cdot \mathbf{w}^i, \sigma|\mathbf{c}_1 \cdot \mathbf{w}^i|)$  and  $b_2^i \stackrel{iid}{\sim} \mathcal{LN}(\mathbf{c}_2 \cdot \mathbf{w}^i, \sigma|\mathbf{c}_2 \cdot \mathbf{w}^i|)$ , where  $\sigma$  controls the signal-to-noise ratio of the log-normal distribution. We then set  $b_i^{(1)} = (1 + \alpha) \max\{b_1^i, b_2^i\}$  and  $b_i^{(2)} = (1 - \alpha) \min\{b_1^i, b_2^i\}$ , where  $\alpha$  is a dilation factor to enlarge the difference between  $b_i^{(1)}$  and  $b_i^{(2)}$ .<sup>3</sup> Moreover, the underlying parameters  $\mathbf{c}_1$  and  $\mathbf{c}_2$  of the two buyers should be correlated, since the bidding prices for high-valued slots should be high for all buyers. In order to model this, we set  $\mathbf{c}_1 = \mathbf{h}_1$  and  $\mathbf{c}_2 = \rho\mathbf{h}_1 + \sqrt{1 - \rho^2}\mathbf{h}_2$ , where  $\mathbf{h}_1, \mathbf{h}_2 \stackrel{iid}{\sim} d^{-1/2}\mathcal{N}(0, I^d)$  and  $\rho$  controls the correlation between  $\mathbf{c}_1$  and  $\mathbf{c}_2$ . We normalize the bid prices so that the mean first price is 1.

Overall, we have three parameters in the data generation process:  $\sigma$  controls the signal-to-noise level of the model,  $\rho$  controls the similarity between two buyers, and  $\alpha$  controls the degree of flexibility the seller has when setting a reserve price.

**Experimentation.** We fix  $d = 50$  features,  $n = 1000$  training samples, along with test and validation data sets each with 5000 samples. We first set a “baseline” configuration for our generative model with  $\sigma = 0.1$ ,  $\rho = 0.9$ , and  $\alpha = 0.1$ . To explore the robustness of our model to changes in the data generation scheme, we then study three variants of this baseline with “high noise” ( $\sigma = 0.5$ ), “low correlation” ( $\rho = 0.5$ ), and “low margin” ( $\alpha = 0.02$ ). For each of these four parameter settings, we give aggregate results over three trials in Table 1. We set a time limit of 3 minutes for each algorithm.

In all four experiments, MIP offers an improvement over DC, typically considerably so. On the baseline configuration, MIP closes an average of 83.5% of the gap left by DC on the training set, and 66.2% of the gap left remaining on the test set. Unsurprisingly, the high noise configuration leads to degradation of performance with respect to the perfect information upper bound, but MIP is still able to close 65.5% and 47.4% of the gap on the training and test data sets, respectively. The low correlation configuration sees MIP closing 79.0% and 61.5% of the remaining gap on training and test data sets, respectively, while on the low margin configuration MIP closes 60.5% of training gap and 16.3% of test gap.

While MIP-R does not quite attain the same level of performance as MIP, it is quite close and still generally outperforms DC both in- and out-of-sample. The LP method also outperforms DC on three of four experiments, albeit by a smaller margin. We observe that DC produces models that lead to sales on nearly every impression. In contrast, the LP algorithm sets reserve prices too aggressively, leading to a model that set reserve prices that lead to failed auctions on roughly 10-20% of impressions. Additionally, we observe that the MIP and MIP-R methods both produce models that yield sales on nearly all impressions. This indicates that they are not exploiting a small number of impressions that garner a high reward, but instead are intelligently setting a reserve price policy that captures excess reward across the population, without too aggressively setting the prices so that many impressions fail to sell.

<sup>3</sup>We note that this dilation is similar to the scaling of linear functions used in the generative model of [38].

| method | train             | test              | method | train             | test              |
|--------|-------------------|-------------------|--------|-------------------|-------------------|
| CP     | 0.790 $\pm$ 0.007 | 0.788 $\pm$ 0.002 | CP     | 0.783 $\pm$ 0.015 | 0.777 $\pm$ 0.020 |
| LP     | 0.854 $\pm$ 0.005 | 0.808 $\pm$ 0.011 | LP     | 0.810 $\pm$ 0.008 | 0.774 $\pm$ 0.025 |
| MIP    | 0.962 $\pm$ 0.006 | 0.924 $\pm$ 0.003 | MIP    | 0.907 $\pm$ 0.013 | 0.858 $\pm$ 0.017 |
| MIP-R  | 0.962 $\pm$ 0.006 | 0.923 $\pm$ 0.002 | MIP-R  | 0.832 $\pm$ 0.004 | 0.792 $\pm$ 0.026 |
| DC     | 0.776 $\pm$ 0.006 | 0.776 $\pm$ 0.002 | DC     | 0.752 $\pm$ 0.004 | 0.750 $\pm$ 0.007 |
| GA     | 0.516 $\pm$ 0.516 | 0.518 $\pm$ 0.518 | GA     | 0.395 $\pm$ 0.418 | 0.386 $\pm$ 0.419 |
| UB     | 0.999 $\pm$ 0.006 | 1.000 $\pm$ 0.001 | UB     | 0.998 $\pm$ 0.004 | 1.000 $\pm$ 0.001 |

(a) Baseline. (b) High noise.

| method | train             | test              | method | train             | test              |
|--------|-------------------|-------------------|--------|-------------------|-------------------|
| CP     | 0.785 $\pm$ 0.026 | 0.781 $\pm$ 0.026 | CP     | 0.911 $\pm$ 0.003 | 0.910 $\pm$ 0.003 |
| LP     | 0.798 $\pm$ 0.037 | 0.766 $\pm$ 0.042 | LP     | 0.917 $\pm$ 0.003 | 0.890 $\pm$ 0.004 |
| MIP    | 0.942 $\pm$ 0.010 | 0.889 $\pm$ 0.014 | MIP    | 0.964 $\pm$ 0.002 | 0.921 $\pm$ 0.007 |
| MIP-R  | 0.943 $\pm$ 0.087 | 0.889 $\pm$ 0.013 | MIP-R  | 0.911 $\pm$ 0.003 | 0.910 $\pm$ 0.003 |
| DC     | 0.733 $\pm$ 0.011 | 0.730 $\pm$ 0.013 | DC     | 0.911 $\pm$ 0.003 | 0.910 $\pm$ 0.003 |
| GA     | 0.488 $\pm$ 0.479 | 0.484 $\pm$ 0.480 | GA     | 0.708 $\pm$ 0.220 | 0.706 $\pm$ 0.222 |
| UB     | 1.001 $\pm$ 0.003 | 0.999 $\pm$ 0.001 | UB     | 1.001 $\pm$ 0.001 | 0.999 $\pm$ 0.001 |

(c) Low correlation. (d) Low margin.

Table 1: Synthetic data results.

Finally, GA does very poorly in all settings with quite high variance of the performance. This makes intuitive sense, as gradient information is less informative when the objective is discontinuous.

### 4.3 eBay auctions for sports memorabilia

We now turn our attention to a real data set. We use a published medium-size eBay data set for reproducibility, which comprises 70,000 sports memorabilia auctions, to illustrate the performance of our algorithms. The data set is provided by Jay Grossman and was subsequently studied in the context of reserve price optimization [38].<sup>4</sup> There are 78 features in the data, with both seller information (e.g. rating and location) and item information. We preprocess the data by normalizing the bidding prices with the mean of their first prices.

Table 2 depicts the average and the 95% confidence interval of the cumulative reward on both training and test data set over 10 random runs. In both, we use 2000 randomly selected samples from the data set for testing and for validation. In Table 2a, we train using 2000 randomly selected samples and a time limit of 5 minutes, while in Table 2b we utilize 5000 training samples and a time limit of 15 minutes.

In Table 2, MIP outperforms all other methods, producing the best performing models as measured on both the training and test data sets. The DC algorithm is the next best performer, producing higher quality models than both LP and MIP-R. Indeed, MIP closes 7.39% of the gap left by DC on the training data set, with respect to the UB upper bound. However, due to a lack of generalization, this number shrinks considerably to 1.66% on the test data set. There is no doubt that DC has a smaller generalization gap, although one plausible explanation for this could be the additional hyperparameters tuned over in the DC method. Moreover, we emphasize that these gaps are computed based on a conservative upper bound (i.e., UB) which, as observed in Section 4.2, may be quite loose.

In order to understand the behavior of the algorithms on larger data sets, we increase the training data sample size to 5000 and repeat the eBay experiments. The results are depicted in Table 2b. While the rankings of the algorithms remains the same, MIP is able to extract more information from the larger data set. The training reward grows, and the models produced also generalize much more successfully to the testing data set. In contrast, the DC algorithm appears unable to exploit the extra available data, with training and test accuracy that remain nearly identical with the previous experiment. Indeed, MIP is able to close 9.11% of the remaining gap on the training data set, and 7.01% on the testing data set.

<sup>4</sup>“Ebay Data Set”, accessed May 25 2020 from <https://cims.nyu.edu/~munoz/data/>. We refer the reader to [38] for a more detailed description of the data set.



| method | train             | test              | method | train             | test              |
|--------|-------------------|-------------------|--------|-------------------|-------------------|
| CP     | 0.563 $\pm$ 0.007 | 0.568 $\pm$ 0.010 | CP     | 0.564 $\pm$ 0.004 | 0.567 $\pm$ 0.023 |
| LP     | 0.668 $\pm$ 0.006 | 0.654 $\pm$ 0.020 | LP     | 0.665 $\pm$ 0.006 | 0.650 $\pm$ 0.016 |
| MIP    | 0.726 $\pm$ 0.009 | 0.714 $\pm$ 0.015 | MIP    | 0.731 $\pm$ 0.009 | 0.725 $\pm$ 0.013 |
| MIP-R  | 0.657 $\pm$ 0.022 | 0.652 $\pm$ 0.027 | MIP-R  | 0.596 $\pm$ 0.038 | 0.596 $\pm$ 0.041 |
| DC     | 0.704 $\pm$ 0.007 | 0.709 $\pm$ 0.016 | DC     | 0.704 $\pm$ 0.007 | 0.704 $\pm$ 0.015 |
| GA     | 0.396 $\pm$ 0.165 | 0.398 $\pm$ 0.165 | GA     | 0.363 $\pm$ 0.164 | 0.363 $\pm$ 0.261 |
| UB     | 0.992 $\pm$ 0.006 | 1.014 $\pm$ 0.018 | UB     | 1.002 $\pm$ 0.006 | 0.999 $\pm$ 0.023 |

(a) 2000 training samples.

(b) 5000 training samples.

Table 2: Ebay data set experiments.

Comparing Table 2a and Table 2b, we can clearly see that the difference in reward produced by MIP between the training and test data sets decreases as number of samples increases. This is intuitively consistent with what could be expected from a learning theory analysis, and we expect that this gap will likely keep shrinking in the “big data” regime as we further enlarge the training sample size.

## 5 Conclusion and Future Directions

In this paper, we study the linear model for reserve price optimization in a second-price auction. We first show that this is indeed a hard problem – unless the Exponential Time Hypothesis fails, there is no polynomial time optimal algorithm. Then we propose a mixed-integer programming formulation and a LP relaxation for solving the problem. Linear models are the simplest learning model for this problem with fast inference and straightforward interpretability. How to extend our approaches developed herein to other learning methods, such as kernel methods and optimal decision trees, are solid future research directions.

### Broader Impact

This work presents new methods, and as such does not have direct societal impact. However, if the context provided allows the model to reason about protected classes or sensitive information, either directly or indirectly, the model—and, therefore, the application of this work—has the potential for adverse effects.

### Funding Disclosure

No third-party funding was received for this work.

### References

- [1] Divesh Aggarwal and Noah Stephens-Davidowitz. (gap/s) eth hardness of svp. In *Proceedings of the 50th Annual ACM SIGACT Symposium on Theory of Computing*, pages 228–238, 2018.
- [2] Kareem Amin, Afshin Rostamizadeh, and Umar Syed. Learning prices for repeated auctions with strategic buyers. In *Advances in Neural Information Processing Systems*, pages 1169–1177, 2013.
- [3] Ross Anderson, Joey Huchette, Will Ma, Christian Tjandraatmadja, and Juan Pablo Vielma. Strong mixed-integer programming formulations for trained neural networks. *Mathematical Programming*, To appear.
- [4] Ross Anderson, Joey Huchette, Christian Tjandraatmadja, and Juan Pablo Vielma. Strong mixed-integer programming formulations for trained neural networks. In Andrea Lodi and Viswanath Nagarajan, editors, *Proceedings of the 20th Conference on Integer Programming and Combinatorial Optimization*, pages 27–42, Cham, 2019. Springer International Publishing. <https://arxiv.org/abs/1811.08359>.

- [5] Egon Balas. Disjunctive programming and a hierarchy of relaxations for discrete optimization problems. *SIAM Journal on Algorithmic Discrete Methods*, 6(3):466–486, 1985.
- [6] Egon Balas. Disjunctive programming: Properties of the convex hull of feasible points. *Discrete Applied Mathematics*, 89:3–44, 1998.
- [7] Dimitris Bertsimas and Jack Dunn. Optimal classification trees. *Machine Learning*, 106(7):1039–1082, July 2017.
- [8] Dimitris Bertsimas and Angela King. An algorithmic approach to linear regression. *Operations Research*, 64(1):2–16, 2015.
- [9] Jeff Bezanson, Alan Edelman, Stefan Karpinski, and Viral B. Shah. Julia: A fresh approach to numerical computing. *SIAM Review*, 59(1):65–98, 2017.
- [10] Mark Braverman, Young Kun Ko, Aviad Rubinfeld, and Omri Weinstein. Eth hardness for densest-k-subgraph with perfect completeness. In *Proceedings of the Twenty-Eighth Annual ACM-SIAM Symposium on Discrete Algorithms*, pages 1326–1341. SIAM, 2017.
- [11] Mark Braverman, Young Kun Ko, and Omri Weinstein. Approximating the best nash equilibrium in no (log n)-time breaks the exponential time hypothesis. In *Proceedings of the twenty-sixth annual ACM-SIAM symposium on Discrete algorithms*, pages 970–982. SIAM, 2014.
- [12] Nicolo Cesa-Bianchi, Claudio Gentile, and Yishay Mansour. Regret minimization for reserve prices in second-price auctions. *IEEE Transactions on Information Theory*, 61(1):549–564, 2014.
- [13] Yijia Chen, Kord Eickmeyer, and Jörg Flum. The exponential time hypothesis and the parameterized clique problem. In *International Symposium on Parameterized and Exact Computation*, pages 13–24. Springer, 2012.
- [14] Rajesh Hemant Chitnis, Hossein Esfandiari, MohammadTaghi Hajiaghayi, Rohit Khandekar, Guy Kortsarz, and Saeed Seddighin. A tight algorithm for strongly connected steiner subgraph on two terminals with demands. In *International Symposium on Parameterized and Exact Computation*, pages 159–171. Springer, 2014.
- [15] Michele Conforti, Gérard Cornuéjols, and Giacomo Zambelli. *Integer Programming*. Springer, 2014.
- [16] Keely L. Croxton, Bernard Gendron, and Thomas L. Magnanti. A comparison of mixed-integer programming models for nonconvex piecewise linear cost minimization problems. *Management Science*, 49(9):1268–1273, September 2003.
- [17] Keely L. Croxton, Bernard Gendron, and Thomas L. Magnanti. Variable disaggregation in network flow problems with piecewise linear costs. *Operations Research*, 55(1):146–157, January-February 2007.
- [18] Marek Cygan, Fedor V Fomin, Łukasz Kowalik, Daniel Lokshtanov, Dániel Marx, Marcin Pilipczuk, Michał Pilipczuk, and Saket Saurabh. Lower bounds based on the exponential-time hypothesis. In *Parameterized Algorithms*, pages 467–521. Springer, 2015.
- [19] Robin Deits and Russ Tedrake. Footstep planning on uneven terrain with mixed-integer convex optimization. In *2014 14th IEEE-RAS International Conference on Humanoid Robots (Humanoids)*, pages 279–286. IEEE, 2014.
- [20] Robin Deits and Russ Tedrake. Efficient mixed-integer planning for UAVs in cluttered environments. In *IEEE International Conference on Robotics and Automation*, pages 42–49, 2015.
- [21] Iain Dunning, Joey Huchette, and Miles Lubin. JuMP: A modeling language for mathematical optimization. *SIAM Review*, 59(2):295–320, 2017.
- [22] David Easley, Jon Kleinberg, et al. *Networks, crowds, and markets*, volume 8. Cambridge university press Cambridge, 2010.
- [23] Armin Fügenschuh, Christine Hayn, and Dennis Michaels. Mixed-integer linear methods for layout-optimization of screening systems in recovered paper production. *Optimization and Engineering*, 15:533–573, 2014.
- [24] T. Graf, P. Van Hentenryck, C. Pradelles-Lasserre, and L. Zimmer. Simulation of hybrid circuits in constraint logic programming. *Computers and Mathematics with Applications*, 20(9–10):45–56, 1990.

- [25] LLC Gurobi Optimization. Gurobi optimizer reference manual, 2020.
- [26] Reiner Horst and Nguyen V Thoai. Dc programming: overview. *Journal of Optimization Theory and Applications*, 103(1):1–43, 1999.
- [27] Russell Impagliazzo and Ramamohan Paturi. On the complexity of k-sat. *Journal of Computer and System Sciences*, 62(2):367–375, 2001.
- [28] R.G. Jeroslow and J.K. Lowe. Modelling with integer variables. *Mathematical Programming Study*, 22:167–184, 1984.
- [29] Peter Jonsson, Victor Lagerkvist, Gustav Nordh, and Bruno Zanuttini. Complexity of sat problems, clone theory and the exponential time hypothesis. In *Proceedings of the twenty-fourth annual ACM-SIAM symposium on Discrete algorithms*, pages 1264–1277. SIAM, 2013.
- [30] Yash Kanoria and Hamid Nazerzadeh. Dynamic reserve prices for repeated auctions: Learning from bids. *Available at SSRN 2444495*, 2017.
- [31] Richard M Karp. On the computational complexity of combinatorial problems. *Networks*, 5(1):45–68, 1975.
- [32] Scott Kuindersma, Robin Deits, Maurice Fallon, Andrés Valenzuela, Hongkai Dai, Frank Permenter, Twan Koolen, Pat Marion, and Russ Tedrake. Optimization-based locomotion planning, estimation, and control design for the atlas humanoid robot. *Autonomous Robots*, 40(3):429–455, 2016.
- [33] Haoxiang Liu and David Z.W. Wang. Global optimization method for network design problem with stochastic user equilibrium. *Transportation Research Part B: Methodological*, 72:20–39, February 2015.
- [34] Daniel Lokshtanov, Dániel Marx, Saket Saurabh, et al. Lower bounds based on the exponential time hypothesis. *Bulletin of the EATCS*, (105):41–72, 2011.
- [35] Miles Lubin and Iain Dunning. Computing in operations research using Julia. *INFORMS Journal on Computing*, 27(2):238–248, Spring 2015.
- [36] Pasin Manurangsi. Almost-polynomial ratio eth-hardness of approximating densest k-subgraph. In *STOC*, pages 954–961. ACM, 2017.
- [37] Daniel Mellinger, Alex Kushleyev, and Vijay Kumar. Mixed-integer quadratic program trajectory generation for heterogeneous quadrotor teams. In *IEEE International Conference on Robotics and Automation*, pages 477–483, 2012.
- [38] Mehryar Mohri and Andrés Muñoz Medina. Learning algorithms for second-price auctions with reserve. *The Journal of Machine Learning Research*, 17(1):2632–2656, 2016.
- [39] Michael Ostrovsky and Michael Schwarz. Reserve prices in internet advertising auctions: a field experiment. *EC*, 11:59–60, 2011.
- [40] Moonkyung Ryu, Yinlam Chow, Ross Anderson, Christian Tjandraatmadja, and Craig Boutilier. CAQL: Continuous action Q-learning. <https://arxiv.org/abs/1909.12397>, 2019.
- [41] Vincent Tjeng, Kai Xiao, and Russ Tedrake. Verifying neural networks with mixed integer programming. In *International Conference on Learning Representations*, 2019.
- [42] Virginia Vassilevska Williams. Hardness of easy problems: Basing hardness on popular conjectures such as the strong exponential time hypothesis (invited talk). In *10th International Symposium on Parameterized and Exact Computation (IPEC 2015)*. Schloss Dagstuhl-Leibniz-Zentrum fuer Informatik, 2015.
- [43] Juan Pablo Vielma. Mixed integer linear programming formulation techniques. *SIAM Review*, 57(1):3–57, 2015.

## A Deferred Proofs

### A.1 Proof of Theorem 1

*Proof.* Let  $G = (V_G, E_G)$  be an arbitrary input graph to the  $k$ -densest subgraph problem, where  $V_G$  is the vertex set of the graph and  $E_G$  is the edge set of the graph. We construct an input to the reserve price optimization problem (1) based on  $G$ , so that if it were possible to solve the reserve price optimization problem for this input in polynomial time, this would imply that it is possible to find a  $1/8$ -approximate solution to the  $k$ -densest subgraph problem on  $G$  in polynomial time. However, it is known that it is impossible to give a polynomial time  $1/8$  approximation algorithm for the densest subgraph problem unless the exponential time hypothesis fails [36]. This implies that it is impossible to solve the reserve price optimization problem (1) unless the exponential time hypothesis fails.

Next, we explain how to construct an input to the reserve price optimization problem (1) based on  $G$ . In the optimization problem we set  $X = [0, 1]^d$ . We have two types of impressions as explained below.

- We have  $|V_G|^2$  impressions  $(\mathbf{w}_1, k, 0)$ , where  $\mathbf{w}_1 = \langle 1, 1, \dots, 1 \rangle$ .
- For each edge  $e = (u, v) \in E_G$ , we have one impression  $(\mathbf{w}_e, 2, 1.5)$ , where  $\mathbf{w}_e$  is a feature vector in which the components corresponding to  $v$  and  $u$  are 1, and all other components are 0.

First, we lower bound the optimal solution of the optimization problem (1) for this input. Consider a densest subgraph  $H = (V_H, E_H)$  of  $G$ , where  $V_H$  is the vertex set of  $H$  and  $E_H$  is the edge set of  $H$ . We define  $\beta_H$  to be a feature vector in which the features corresponding to the vertices of  $V_H$  are 1, and all other features are 0. Next we bound  $R(\beta_H)$ . We use this as a lower bound the optimum solution of the optimization problem (1).

Note that  $\mathbf{w}_1 \cdot \beta_H = k$ , and hence the contribution of each of the first type of impressions to  $R(\beta_H)$  is  $\frac{k}{n}$ . Also, for each edge  $e \in E_H$  we have  $\mathbf{w}_e \cdot \beta_H = 2$  and hence the contribution of each of the second type of impressions corresponding to an edge in  $E_H$  to  $R(\beta_H)$  is  $\frac{2}{n}$ . Therefore, we have

$$R(\beta_H) = \frac{1}{n} \left( k|V_G|^2 + 1.5|E_G| + 0.5|E_H| \right). \quad (6)$$

Next, we upper bound the optimal solution of the optimization problem (1) for our input. Let  $\beta = \langle \beta_1, \dots, \beta_{V_G} \rangle$  be the vector that maximizes  $R(\beta)$ . Note that if  $\sum_v \beta_v > k$ , the contribution of the first type of impressions is 0. This means that  $R(\beta) \leq 2|E_G| < R(\beta_H)$ , which is a contradiction. Therefore, without loss of generality we can assume that  $\sum_i \beta_i \leq k$ .

Let  $V^\beta$  be the set of vertices in  $V_G$  with  $\beta_v \geq 0.5$ . Let  $G^\beta = (V^\beta, E^\beta)$  be the subgraph of  $G$  induced by  $V^\beta$ . Note that if for a vertex  $v$  we have  $\beta_v < 0.5$ , then for each edge  $e = (v, u)$  neighboring  $v$ , we have  $\mathbf{w}_e \cdot \beta_H \leq 1 + 0.5 = 1.5$ . Therefore, we have

$$R(\beta) \leq k|V_G|^2 + 1.5|E_G| + 0.5|E^\beta|. \quad (7)$$

Now, we put inequalities (6) and (7) together to complete the proof. By the optimality of  $\beta$  we have  $R(\beta_H) \leq R(\beta)$ . This together with inequalities (6) and (7) implies that  $|E_H| \leq |E^\beta|$ . Moreover, recall that for every vertex  $v$  in  $V^\beta$  we have  $\beta_v \geq 0.5$ . Also, we have  $\sum_i \beta_i \leq k$ . Hence, we have  $|V^\beta| \leq 2k$ . Given a graph with  $2k$  vertices, one can easily cover the edges with 8 subgraphs of size  $k$ . By the pigeon hole principle one of these subgraphs contains  $\frac{E^\beta}{8} \geq \frac{E_H}{7}$  edges, and hence it is a  $\frac{1}{8}$ -approximate solution to the densest subgraph.  $\square$

### A.2 Proof of Proposition 1

*Proof.* First, we show that each optimal solution for (1) has a corresponding feasible point for (3) with equal objective value. Take some  $\beta^*$  optimal for (1). Setting  $v_i^* = \mathbf{w}_i \cdot \beta^*$  for each  $i$ , the feasibility of  $\beta^*$  (i.e.  $\beta^* \in X$ ) implies that  $l_i \leq v_i^* \leq u_i$  from the definition of  $l_i$  and  $u_i$ . Now take

$y_i^* = r(v_i^*)$  for each  $i$ ; clearly (3c) is satisfied. Therefore,  $(\beta^*, \mathbf{v}^*, \mathbf{y}^*)$  is feasible for (3) and has objective value  $\frac{1}{n} \sum_{i=1}^n r(v_i; b_i^{(1)}, b_i^{(2)})$ .

Next, we show that each optimal solution  $(\beta^*, \mathbf{v}^*, \mathbf{y}^*)$  for (3) corresponds to a feasible point  $\beta^*$  for (1) with the same objective value. Clearly  $\beta^*$  is feasible for (1). Additionally, (3c) means that for each  $i$ , if  $v_i^* \neq b_i^{(1)}$  then  $y_i^* = r(v_i^*)$ , whereas if  $v_i^* = b_i^{(1)}$  then  $y_i^* \in \{r(v_i^*) \equiv b_i^{(1)}, 0\}$ . As  $b_i^{(1)} \geq 0$ , the optimality of  $(\beta^*, \mathbf{v}^*, \mathbf{y}^*)$  implies that we must have  $y_i^* = r(v_i^*)$ . Therefore, the objective value of  $(\beta^*, \mathbf{v}^*, \mathbf{y}^*)$  is  $\frac{1}{n} \sum_{i=1}^n r(v_i^*; b_i^{(1)}, b_i^{(2)})$ , giving the result.  $\square$

### A.3 Proof of Proposition 2

*Proof.* Suppose  $(\hat{v}, \hat{y}, \hat{z})$  is feasible for (5). It follows from (5d-5e) that exactly one component of  $\hat{z}$  is equal to one, with the other two components equal to zero. We now consider each of these three cases.

If  $\hat{z}_1 = 1$ , then the constraints (5a-5c) reduce to  $y = b^{(2)}$ ,  $v \leq y \leq v + b^{(2)} - l$ , and  $l \leq v \leq u$ . Plugging in the equation for  $y$  into the second pair of inequalities yields  $l \leq v \leq b^{(2)}$ , which are the constraints defining  $S_1$ .

If  $\hat{z}_2 = 1$ , the constraints (5a-5c) reduce to  $b^{(2)} \leq y \leq b^{(1)}$ ,  $y = v$ , and  $l \leq v \leq u$ , which are equivalent to the constraints defining  $S_2$ .

Finally, if  $\hat{z}_3 = 1$ , the constraints (5a-5c) reduce to  $y = 0$ ,  $v - u \leq y \leq v - b^{(1)}$ , and  $l \leq v \leq u$ . Plugging the equation into the pair of inequalities yields  $b^{(2)} \leq v \leq u$ , i.e. the constraints are equivalent to those defining  $S_3$ .  $\square$

### A.4 Proof of Proposition 3

**Lemma 1.** *The closure of  $gr(r(\cdot; b^{(1)}, b^{(2)}); D)$  is  $S_1 \cup S_2 \cup S_3$ , where*

$$S_1 = \left\{ (v, y) \in D \times \mathbb{R} \left| \begin{array}{l} y = b^{(2)} \\ v \leq b^{(2)} \end{array} \right. \right\} \quad (8a)$$

$$S_2 = \left\{ (v, y) \in D \times \mathbb{R} \left| \begin{array}{l} y = v \\ b^{(2)} \leq v \leq b^{(1)} \end{array} \right. \right\} \quad (8b)$$

$$S_3 = \left\{ (v, y) \in D \times \mathbb{R} \left| \begin{array}{l} y = 0 \\ v \geq b^{(1)} \end{array} \right. \right\}. \quad (8c)$$

*Proof (Proposition 3).* Take  $D$  as the set of all  $(v, y, \mathbf{z})$  feasible for (5). Using Lemma 1, we can infer that  $D = \bigcup_{i=1}^3 (S_i \times \{\mathbf{e}^i\})$ , where  $\mathbf{e}^i \in \{0, 1\}^3$  is the  $i$ -th unit vector of all zeros except a 1 in the  $i$ -th coordinate. Therefore, it can be expressed as a finite union of bounded polyhedron. Applying techniques due to Balas [5, 6], we can write a lifted representation for the convex hull of  $D$ , i.e. one

with auxiliary  $v^i$  and  $y^i$  variables:

$$v = \sum_{i=1}^3 v^i \quad (9a)$$

$$y = \sum_{i=1}^3 y^i \quad (9b)$$

$$y^1 = b^{(2)} z_1 \quad (9c)$$

$$l z_1 \leq v^1 \leq b^{(2)} z_1 \quad (9d)$$

$$y^2 = v^2 \quad (9e)$$

$$b^{(2)} z_2 \leq v^2 \leq b^{(1)} z_2 \quad (9f)$$

$$y^3 = 0 \quad (9g)$$

$$b^{(1)} z_3 \leq v^3 \leq u z_3 \quad (9h)$$

$$1 = z_1 + z_2 + z_3 \quad (9i)$$

$$\mathbf{z} \in [0, 1]^3. \quad (9j)$$

Moreover, if  $R$  is the set of all points feasible for (9), it is known that  $\text{Proj}_{v,y,\mathbf{z}}(R) = \text{Conv}(D)$ , i.e. the orthogonal projection eliminating the auxiliary variables  $v^i$  and  $y^i$  yields the convex hull of the set of interest  $D$ . Therefore, the result follows by explicitly computing this projection, yielding a system of linear constraints equivalent to the LP relaxation of (5), i.e. (5a-5d).

Use the three equations (9c), (9e), and (9g) to eliminate the  $y^i$  variables. Then we may use the remaining equations (9a-9b) to eliminate  $v^1$  and  $v^2$ , leaving the system

$$\begin{aligned} l z_1 &\leq v - y + b^{(2)} z_1 - v^3 \leq b^{(2)} z_1 \\ b^{(2)} z_2 &\leq y - b^{(2)} z_1 \leq b^{(1)} z_2 \\ b^{(1)} z_3 &\leq v^3 \leq u z_3 \\ 1 &= z_1 + z_2 + z_3 \\ \mathbf{z} &\in [0, 1]^3. \end{aligned}$$

We may then apply the Fourier-Motkzin elimination procedure (e.g. [15, Chapter 3.1]) to project out the last remaining auxiliary variable  $v^3$ , giving the result.  $\square$

#### A.5 Proof of Proposition 4

*Proof.* Parameterize the sequence of instances by  $i$ . For each  $i$ , define  $\mathbf{w}^{i,1} = (\sqrt{1-i^{-2}}, i^{-1})$ ,  $\mathbf{w}^{i,2} = (-\sqrt{1-i^{-2}}, i^{-1})$ ,  $b_i^{(1)} = 1$ , and  $b_i^{(2)} = 0$ . Note that  $\|\mathbf{w}^{i,1}\|_2 = \|\mathbf{w}^{i,2}\|_2 = 1$ , and so all the problem data is bounded in magnitude by one. The unique optimal solution to (1) is  $\beta^{i,*} = (0, i)$ , giving the result.  $\square$

#### A.6 Proof of Proposition 5

*Proof.* The bound on objective values follows immediately from Corollary 1 and the fact that  $F(b^{(1)}, b^{(2)}, l, u) \subseteq W(b^{(1)}, b^{(2)}, l, u)$  for any choice of data. Additionally, as (1) only constrains  $\beta \in X$ , feasibility follows from (3d).  $\square$

#### A.7 Proof of Proposition 6

*Proof.* Consider the following problem instance parameterized by a positive integer  $T$ . Take  $n = 2T$ ,  $m = 2$ , and  $X = [-1, +1] \times \{+1\}$ . Furthermore, for each  $i \in \llbracket T \rrbracket$ , define  $\mathbf{w}^{+,i} = (T, 1 - i)$ ,  $b_{+,i}^{(1)} = 1$ , and  $b_{+,i}^{(2)} = 0$ . Similarly, for each  $i \in \llbracket T \rrbracket$ , define  $\mathbf{w}^{-,i} = (-T, 1 - i)$ ,  $b_{-,i}^{(1)} = 1$ , and  $b_{-,i}^{(2)} = 0$ . From inspection, we can observe that for any  $\beta \in X$ , there is at most one  $i$  with

$r(\mathbf{w}^i \cdot \boldsymbol{\beta}; b_i^{(1)}, b_i^{(2)}) > 0$ . Therefore, we can infer that the optimal reward for (1) is 1, which can be attained by setting  $\boldsymbol{\beta} = (k/T, 1)$  for any  $k \in \bigcup_{k=1}^T \{-k/T, +k/T\}$ .

In contrast, the LP relaxation bound can be bounded below by a constant. By projecting out the auxiliary  $\mathbf{z}$  variables from the LP relaxation (5a-5d), we can compute that the convex hull of  $\text{cl}(\text{gr}(r(\cdot; 0, 1); [l, u]))$  is

$$Q(l, u) := \left\{ (v, y) \in [l, u] \times \mathbb{R}_{\geq 0} \mid y \leq \frac{1}{1-l}(v-l), y \leq \frac{1}{u-1}(u-v) \right\}.$$

Furthermore, for each  $i \in \llbracket T \rrbracket$  we can compute valid bounds on  $v_{+,i}$  as  $l_{+,i} = \min_{\beta \in X} \mathbf{w}^{+,i} \cdot \boldsymbol{\beta} = -T + 1 - i$  and  $u_{+,i} = \max_{\beta \in X} \mathbf{w}^{+,i} \cdot \boldsymbol{\beta} = T + 1 - i$ . Similarly, valid bounds for each  $v^{-,i}$  are  $l^{-,i} = -T + 1 - i$  and  $u^{-,i} = T + 1 - i$ . Piecing it all together, we now fix  $\boldsymbol{\beta} = (0, 1)$ , which due to (3b) will fix  $v_{+,i} = v^{-,i} = 1 - i$  for each  $i \in \llbracket T \rrbracket$ . Accordingly, the largest value we may set  $y_{+,i}$  such that  $(v_{+,i}, y_{+,i}) \in Q(l_{+,i}, u_{+,i})$  is  $y_{+,i} = \frac{T}{T+i}$ . Similarly, the maximum allowed value for each  $y_{-,i}$  such  $(v, y) \in W(b^{(1)}, b^{(2)}, l, u)$  is satisfied is  $y_{-,i} = \frac{T}{T+i}$ . The reward at this LP feasible point is then

$$\begin{aligned} \frac{1}{n} \sum_{i=1}^T (y^{+,i} + y^{-,i}) &= \frac{1}{n} \sum_{i=1}^T \left( \frac{T}{T+i} + \frac{T}{T+i} \right) \\ &= \sum_{i=1}^T \frac{1}{T+i} \geq \sum_{i=1}^T \frac{1}{2T} = 1. \end{aligned}$$

□
